# Supplementary material
Source: publisher site journal article supplement (https://www.dovepress.com/article/366138)
Supplement: Supplementary file 1 [file get_supplementary_file.php]

**SUPPLEMENTARY INFORMATION**

# TITLE

Preparation of zein-based nanoparticles: nanoprecipitation *versus* microfluidic-assisted manufacture, effects of PEGylation on nanoparticle characteristics and cellular uptake by melanoma cells

**AUTHORS NAMES AND AFFILIATIONS**

Jitkasem Meewan1, Sukrut Somani1, Jamal Almowalad1, Partha Laskar1, Margaret Mullin2, Graeme MacKenzie1, Swapnil Khadke1, Yvonne Perrie1, Christine Dufès1,*

1 Strathclyde Institute of Pharmacy and Biomedical Sciences, University of Strathclyde, Glasgow G4 0RE, United Kingdom

2 Glasgow Imaging Facility, College of Medical, Veterinary and Life Sciences, University of Glasgow, Glasgow G12 8QQ, United Kingdom

*** Corresponding author:** Christine Dufès

Strathclyde Institute of Pharmacy and Biomedical Sciences, University of Strathclyde, 161 Cathedral Street, Glasgow G4 0RE, United Kingdom

Phone: 44 -141 548 3796

Fax: 44 -141 552 2562

E-mail: [C.Dufes@strath.ac.uk](mailto:C.Dufes@strath.ac.uk)

**Optimization of production parameters using microfluidic system**

Zein (5-30 mg) was dissolved in 1 mL of 80% (v/v) ethanol (forming 0.5-3% w/v solution) and stirred at 700 rpm overnight at 25ºC. The zein solution was filtered through a 13-mm syringe filter (0.8 µm). Subsequently, CR6 (0.02-0.1% w/w of zein) was added to the filtered zein solution and the mixture was stirred at 400 rpm for 1 h at 37ºC. The samples were run at various total flow rates (TFR) and flow rate ratios (FRR) between the water and the zein phase. The mixing process took place in a microfluidic cartridge at room temperature and the nanoparticles were collected at the microfluidics chip’s outlet channel. The collected samples were placed in a 50ºC room to anneal for 1.5 h to enable CR6 loading into the nanoparticles. Samples (1 mL) were then transferred to 1.5 mL Eppendorf tubes and purified by one cycle of centrifugation (1000 g, for 10 min, at 25ºC) to remove ethanol and free CR6. Pellets were resuspended in 1 mL Milli-Q® water and were left to settle at room temperature for 1 h before analysis.

**Supplementary Table S1.** Characteristics of zein nanoparticles synthesized in the microfluidic Y- junction and the effect of various experimental parameters used in this work. Results represent mean ± standard deviation of triplicate readings.

|  |  |  |  |  |  |
| --- | --- | --- | --- | --- | --- |
| **Parameters** | | **Average size** | **PDI** | **Zeta potential** | **EE (%)** |
|  |  | **(nm)** |  | **(mV)** |  |
| Zein (% w/v) | 0.5 | 140.2 ± 2.5 | 0.07 ± 0.01 | 25.7 ± 1.6 | 14.5 ± 0.2 |
|  | 1 | 153.1 ± 3.0 | 0.07 ± 0.01 | 31.0 ± 0.1 | 11.2 ± 0.4 |
|  | 2 | 158.1 ± 1.6 | 0.06 ± 0.02 | 30.7 ± 0.9 | 12.7 ± 0.6 |
|  | 3 | 171.6 ± 4.0 | 0.04 ± 0.03 | 34.5 ± 1.0 | 10.4 ± 0.5 |
| CR6 loading | 0.02 | 157.5 ± 1.2 | 0.06 ± 0.01 | 25.7 ± 0.3 | 10.8 ± 0.2 |
| (% w/w) | 0.05 | 151.2 ± 0.5 | 0.05 ± 0.02 | 27.3 ± 0.8 | 10.1 ± 0.1 |
|  | 0.1 | 152.1 ± 0.8 | 0.08 ± 0.03 | 25.5 ± 0.9 | 10.3 ± 0.2 |
| Flow Rate Ratio | 1:1 | Aggregation | | | |
| (FRR) | 3:1 | 151.2 ± 0.5 | 0.05 ± 0.02 | 27.3 ± 0.8 | 10.1 ± 0.1 |
|  | 5:1 | 92.6 ± 0.6 | 0.16 ± 0.01 | 20.0 ± 1.5 | 5.5 ± 0.1 |
| Total Flow Rate | 0.5 | 211.6 ± 4.2 | 0.13 ± 0.04 | 34.6 ± 0.4 | 7.8 ± 0.3 |
| (TFR) (mL/min) | 2 | 165.1 ± 5.3 | 0.09 ± 0.04 | 32.2 ± 0.5 | 6.8 ± 0.1 |
|  | 6 | 158.1 ± 1.6 | 0.06 ± 0.02 | 30.7 ± 0.9 | 12.7 ± 0.6 |

**Optimization of production parameters using nanoprecipitation method**

Zein solution (0.5% w/v in 80% ethanol) was stirred at 700 rpm overnight at 25ºC before being filtered through a 13-mm syringe filter (0.8 µm). Next, CR6 (0.1% w/w of zein) was added and the solution was stirred at 400 rpm for 1 h at 37ºC. Two nanoprecipitation methods were examined: Method 1: nanoparticles were formed by the dropwise addition of organic phase (zein and CR6 solution) to aqueous phase (Milli-Q® water)

Method 2: nanoparticles were formed by the dropwise addition of aqueous phase (Milli-Q® water) to organic phase (zein and CR6 solution).

The addition of one phase to another was carried out under stirring at 700 rpm. Volume ratio of aqueous to organic phase was varied from 1:1 to 5:1. The nanoparticles were placed at 50°C to anneal for 1.5 h and were then pelleted by one cycle of centrifugation at 1000 g for 10 min at 25ºC. Pellets were resuspended in 1 mL Milli-Q® water and were left to settle at room temperature for 1 h before analysis.

**Supplementary Table S2.** Characteristics ofzein nanoparticles prepared by nanoprecipitation method optimized by variation of the following parameters: preparation method and volume ratio of aqueous to organic phase. Results represent mean ± standard deviation of triplicate readings.

|  |  |  |  |  |  |
| --- | --- | --- | --- | --- | --- |
| **Method** | **Volume ratio of aqueous to organic phase** | **Average size** | **PDI** | **Zeta potential** | **EE (%)** |
|  | **(nm)** |  | **(mV)** |  |
| Method 1 | 1:1 | 675.8 ± 36.3 | 0.22 ± 0.08 | 41.4 ± 0.4 | 4.9 ± 0.2 |
|  | 2:1 | 165.9 ± 1.8 | 0.07 ± 0.03 | 34.2 ± 1.4 | 4.1 ± 0.1 |
|  | 3:1 | 104.8 ± 1.7 | 0.09 ± 0.02 | 34.0 ± 2.2 | 3.6 ± 0.1 |
|  | 4:1 | 70.2 ± 0.6 | 0.24 ± 0.02 | 32.8 ± 2.7 | 2.2 ± 0.0 |
|  | 5:1 | 60.5 ± 0.7 | 0.25 ± 0.02 | 35.6 ± 3.1 | 2.0 ± 0.0 |
| Method 2 | 1:1 | Aggregation | | | |
|  | 2:1 | Aggregation | | | |
|  | 3:1 | 538.7 ± 13.2 | 0.03 ± 0.03 | 30.5 ± 0.5 | 56.1 ± 1.9 |
|  | 4:1 | 388.1 ± 4.4 | 0.24 ± 0.02 | 31.1 ± 0.8 | 64.0 ± 1.0 |
|  | 5:1 | 343.9 ± 13.6 | 0.27 ± 0.01 | 27.8 ± 0.3 | 55.6 ± 0.4 |
